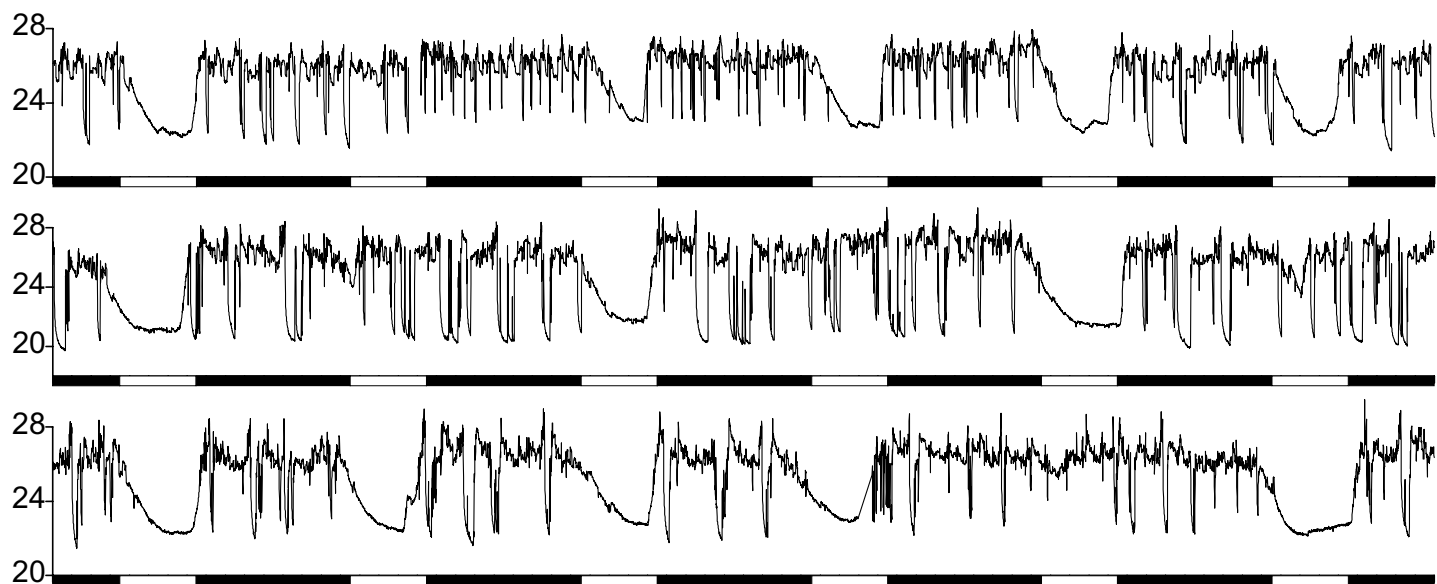

**Fig. S1. Body surface temperature.** Data (1 min resolution) from six consecutive days are shown for a H6L3 (top), a L6H3 (middle) and a HOA hamster (bottom) to demonstrate easy determination of torpor bouts. The light–dark cycle is represented by black and white bars.
